# Supplementary material
Source: HighWire-hosted journal article supplement (https://www.cmaj.ca/highwire/filestream/57689/field_highwire_adjunct_files/0/private-char-1-at.pdf)
Supplement: private-char-1-at.pdf [file private-char-1-at.pdf]

**Appendix 1: Sources of information on rural private water supplies**

| Source                                                  | Website                                                                                                                                                                                                                                                                                      |
|---------------------------------------------------------|----------------------------------------------------------------------------------------------------------------------------------------------------------------------------------------------------------------------------------------------------------------------------------------------|
| Agriculture and Agri-Food Canada                        | <a href="http://www4.agr.gc.ca/AAFC-AAC/display-afficher.do?id=1187637343829&amp;lang=eng">www4.agr.gc.ca/AAFC-AAC/display-afficher.do?id=1187637343829&amp;lang=eng</a>                                                                                                                     |
| Ontario Ministry of Agriculture, Food and Rural Affairs | <a href="http://www.omafra.gov.on.ca/english/environment/water/publications.htm">www.omafra.gov.on.ca/english/environment/water/publications.htm</a><br><a href="http://www.omafra.gov.on.ca/english/environment/bmp/series.htm">www.omafra.gov.on.ca/english/environment/bmp/series.htm</a> |
| Ontario Ministry of Health and Long-term Care           | <a href="http://www.health.gov.on.ca/english/public/pub/watersafe/watersafe_wellknow.html">www.health.gov.on.ca/english/public/pub/watersafe/watersafe_wellknow.html</a>                                                                                                                     |
| Alberta Agriculture and Rural Development               | <a href="http://www1.agric.gov.ab.ca/\$department/deptdocs.nsf/all/wwg404">www1.agric.gov.ab.ca/\$department/deptdocs.nsf/all/wwg404</a><br><a href="http://www.agric.gov.ab.ca/app84/rwqit">www.agric.gov.ab.ca/app84/rwqit</a>                                                             |
| Saskatchewan Watershed Authority                        | <a href="http://www.swa.ca/Stewardship/AssessmentMonitoring/Default.asp">www.swa.ca/Stewardship/AssessmentMonitoring/Default.asp</a><br><a href="http://www.prairiewaternews.ca/">www.prairiewaternews.ca/</a>                                                                               |
| US Centers for Disease Control and Prevention           | <a href="http://www.cdc.gov/healthywater/drinking/private/wells/index.html">www.cdc.gov/healthywater/drinking/private/wells/index.html</a>                                                                                                                                                   |
| The Scottish Executive                                  | <a href="http://www.privatewatersupplies.gov.uk/private_water/21.html">www.privatewatersupplies.gov.uk/private_water/21.html</a>                                                                                                                                                             |
